# Supplementary material for: Algorithmic Modelling of Financial Conditions for Macro Predictive Purposes: Pilot Application to USA Data
Source: MDPI journal article supplement (doi:10.3390/econometrics10020022), 2022-04-19
Supplement: s1 [file s1]

# FCI R Documentation

August 2018

# Contents

|          |                                 |           |
|----------|---------------------------------|-----------|
| <b>1</b> | <b>Algorithm Outline</b>        | <b>3</b>  |
| 1.1      | Preparation . . . . .           | 4         |
| 1.1.1    | Lags . . . . .                  | 4         |
| 1.1.2    | Standardization . . . . .       | 4         |
| 1.2      | LRFCI Construction . . . . .    | 5         |
| 1.2.1    | Calculation . . . . .           | 5         |
| 1.2.2    | Index Concatenation . . . . .   | 7         |
| 1.3      | SRFCI Construction . . . . .    | 8         |
| 1.3.1    | Calculation . . . . .           | 8         |
| 1.3.2    | Index Concatenation . . . . .   | 8         |
| <b>2</b> | <b>Documentation</b>            | <b>10</b> |
| 2.1      | LRFCI_main . . . . .            | 11        |
| 2.1.1    | Path Variables . . . . .        | 11        |
| 2.1.2    | Input File Names . . . . .      | 11        |
| 2.1.3    | Function Parameters . . . . .   | 11        |
| 2.1.4    | Output File Names . . . . .     | 12        |
| 2.1.5    | Script Function Calls . . . . . | 13        |
| 2.2      | SRFCI_main . . . . .            | 14        |
| 2.2.1    | Path Variables . . . . .        | 14        |
| 2.2.2    | Input File Names . . . . .      | 14        |
| 2.2.3    | Function Parameters . . . . .   | 14        |
| 2.2.4    | Output File Names . . . . .     | 15        |
| 2.2.5    | Script Function Calls . . . . . | 16        |
| 2.3      | Common . . . . .                | 17        |
| 2.3.1    | packages_check . . . . .        | 17        |
| 2.3.2    | data_read . . . . .             | 17        |
| 2.3.3    | sample_interval . . . . .       | 17        |
| 2.3.4    | standardize_data . . . . .      | 18        |
| 2.3.5    | weight_table . . . . .          | 19        |
| 2.4      | LRFCI . . . . .                 | 19        |
| 2.4.1    | pls1 . . . . .                  | 19        |
| 2.4.2    | matpls1 . . . . .               | 20        |
| 2.4.3    | modifiedW . . . . .             | 20        |

|          |                               |           |
|----------|-------------------------------|-----------|
| 2.4.4    | sparseW . . . . .             | 21        |
| 2.4.5    | insig_stats . . . . .         | 21        |
| 2.4.6    | all_matpls1 . . . . .         | 22        |
| 2.4.7    | mov_win_pls . . . . .         | 23        |
| 2.4.8    | conca . . . . .               | 24        |
| 2.4.9    | flatten_wgt . . . . .         | 24        |
| 2.5      | SRFCI . . . . .               | 25        |
| 2.5.1    | gen_samp . . . . .            | 25        |
| 2.5.2    | regr . . . . .                | 26        |
| 2.5.3    | leading_filter . . . . .      | 26        |
| 2.5.4    | sr_conca . . . . .            | 27        |
| <b>3</b> | <b>Note</b>                   | <b>28</b> |
| 3.1      | LRFCI Note . . . . .          | 29        |
| 3.1.1    | Regression . . . . .          | 29        |
| 3.1.2    | Factor Construction . . . . . | 30        |
| 3.2      | SRFCI Note . . . . .          | 30        |

## Chapter 1

# Algorithm Outline

## 1.1 Preparation

We start with a data matrix starting at time  $t$

$$X_T^0 = [\mathbf{x}_{T,1}^0, \mathbf{x}_{T,2}^0 \dots \mathbf{x}_{T,n}^0]$$

where  $\mathbf{x}_{T,i}^0$  is the  $i^{th}$ ,  $i = 1, \dots, n$  independent variable of  $T$  periods starting at time 0 and  $x_{t,i}$  is the  $t^{th}$  row and  $i^{th}$  column of  $X_T^0$ ,

$$\mathbf{x}_{T,i}^0 = \begin{bmatrix} x_{1,i} \\ x_{2,i} \\ \vdots \\ x_{T,i} \end{bmatrix}$$

We also have  $\mathbf{y}_T$  as the dependent variable of length  $T$ ,

$$\mathbf{y}_T = \begin{bmatrix} y_1 \\ y_2 \\ \vdots \\ y_T \end{bmatrix}$$

### 1.1.1 Lags

We first create  $q$  lags for each  $\mathbf{x}_{T,i}^0$ . Let  $\mathbf{x}_{T-q,i}^0$  be the lag  $q$  version of  $\mathbf{x}_{T,i}^0$ , where

$$\mathbf{x}_{T-q,i}^0 = \begin{bmatrix} - \\ \vdots \\ - \\ x_{1,i} \\ x_{2,i} \\ \vdots \\ x_{T-q,i} \end{bmatrix} \left. \vphantom{\begin{bmatrix} - \\ \vdots \\ - \\ x_{1,i} \\ x_{2,i} \\ \vdots \\ x_{T-q,i} \end{bmatrix}} \right\} q \text{ empty entries}$$

### 1.1.2 Standardization

We then standardize each column. Let  $\mathbf{x}_{T-q,i}$  be the standardized version of  $\mathbf{x}_{T-q,i}^0$ .

$$\mathbf{x}_{T-q,i} = \frac{\mathbf{x}_{T-q,i}^0 - \overline{\mathbf{x}_{T-q,i}^0}}{s_{\mathbf{x}_{T-q,i}^0}}$$

where  $\overline{\mathbf{x}_{T-q,i}^0}$  and  $s_{\mathbf{x}_{T-q,i}^0}$  are the sample mean and sd respectively.

## 1.2 LRFCI Construction

We work with lags 0 to  $q$  in the LRFCI construction. Let  $X_t$  be the independent data matrix.

$$X_T = [\mathbf{x}_{T,1}, \mathbf{x}_{T-1,1}, \dots, \mathbf{x}_{T-q,1}, \mathbf{x}_{T,2}, \mathbf{x}_{T-1,2}, \dots, \mathbf{x}_{T-q,2}, \dots, \mathbf{x}_{T,n}, \mathbf{x}_{T-1,n}, \dots, \mathbf{x}_{T-q,n}]$$

and also denote  $X_{T+h}$  be the matrix of column  $i$  as  $\mathbf{x}_{T+h,i}$

$$\mathbf{x}_{T+h,i} = \begin{bmatrix} x_{1,i} \\ x_{2,i} \\ \vdots \\ x_{T,i} \\ x_{T+1,i} \\ \vdots \\ x_{T+h,i} \end{bmatrix}$$

### 1.2.1 Calculation

The algorithm is as the following:

---

#### Algorithm 1 LRFCI Construction

---

- 1: **for** each increasing update interval  $u_j, j \leftarrow 0$  to  $N$  **do**
  - 2:     Standardize  $X_{T+u_j}$  by its mean and sd
  - 3:     Compute the weight vector:  $\mathbf{w}_{u_j} = X_{T+u_j}^T \mathbf{y}_{T+u_j}$
  - 4:     Set  $\mathbf{w}_{u_j} = \frac{\mathbf{w}_{u_j}}{|\mathbf{w}_{u_j}|}$
  - 5:     **for**  $i = 1$  to  $n$  **do**
  - 6:         **for**  $k = 0$  to  $q$  **do**
  - 7:             **if**  $|w_{i,k,u_j}| = \max_q |w_{i,q,u_j}|$  **then**
  - 8:                  $w_{i,k,u_j} = w_{i,k,u_j}$
  - 9:             **else**
  - 10:                  $w_{i,k,u_j} = 0$
  - 11:             **end if**
  - 12:         **end for**
  - 13:     **end for**
  - 14:     Standardize  $X_{T+u_j+h}$  by the mean and sd of  $X_{T+u_j}$
  - 15:     Compute the first factor  $\mathbf{f}_{T+u_j+h} = X_{T+u_j+h} \mathbf{w}_{u_j}$
  - 16:     Standardize  $\mathbf{f}_{T+u_j+h}$  by the mean and sd of  $\mathbf{f}_{T+u_j}$
  - 17:     Set LRFCI  $\mathbf{f}_{u_j}^{lr} = \mathbf{f}_{T+u_j+h} \times s_{\mathbf{y}_{T+u_j}} + \overline{\mathbf{y}_{T+u_j}}$
  - 18: **end for**
-

In **line 3 and 4**, a weight vector as the following is produced:

$$\mathbf{w}_{u_j} = \begin{bmatrix} w_{1,0,u_j} \\ w_{1,1,u_j} \\ \vdots \\ w_{1,q,u_j} \\ w_{2,0,u_j} \\ w_{2,1,u_j} \\ \vdots \\ w_{2,q,u_j} \\ \vdots \\ w_{n,0,u_j} \\ w_{n,1,u_j} \\ \vdots \\ w_{n,q,u_j} \end{bmatrix}$$

where  $w_{i,q,t}$  is the weight for the  $i^{th}$  independent variable with lags  $q$  at time  $t$ . The weight for the  $i^{th}$  independent variable including lags is

$$\mathbf{w}_{i,u_j} = \begin{bmatrix} w_{i,0,u_j} \\ w_{i,1,u_j} \\ \vdots \\ w_{i,q,u_j} \end{bmatrix}$$

In **line 5**, We want to keep only the weight with the largest magnitude. For example if the maximum weight occurs at the first lag, i.e.  $\max |w_{i,q,u_j}| = |w_{i,1,u_j}|$  then we set other weights to zero and this sub-vector becomes

$$\mathbf{w}'_{i,u_j} = \begin{bmatrix} 0 \\ w_{i,1,u_j} \\ \vdots \\ 0 \end{bmatrix}$$

In **line 15**, out-of-sample data of the independent variables are included to create forecasting values,

$$\mathbf{f}_{T+u_j+h} = \begin{bmatrix} f_1 \\ f_2 \\ \vdots \\ f_{T+u_j} \\ f_{T+u_j+1} \\ \vdots \\ f_{T+u_j+h} \end{bmatrix}$$

The values  $[f_{T+u_j+1}, f_{T+u_j+2}, \dots, f_{T+u_j+h}]$  are forecasting values.

### 1.2.2 Index Concatenation

Since our goal is to create an index, the old values should be kept for consistency.

---

**Algorithm 2** LRFCI Concatenation

---

```

1: for each update interval  $u_j$ ,  $j \leftarrow 0$  to  $N$  do
2:   for each update interval  $u_k$ ,  $k > j$  do
3:     Set  $\mathbf{f}_{u_k}^{lr} = \mathbf{f}_{u_j}^{lr}$ 
4:   end for
5: end for

```

---

For example, Let  $f_{u_i,t}^{lr}$  be the  $t^{th}$  entry of  $\mathbf{f}_{u_i}^{lr}$ , in the first update,

$$\mathbf{f}_{u_1}^{lr} = \begin{bmatrix} \mathbf{f}_{u_0}^{lr} \\ f_{u_1, T+u_0+1}^{lr} \\ f_{u_1, T+u_0+2}^{lr} \\ \vdots \\ f_{u_1, T+u_1+h}^{lr} \end{bmatrix}$$



### 1.3 SRFCI Construction

For SRFCI, we exclude the lag 0 term. The data matrix of independent variables is

$$X_T = [\mathbf{x}_{T-1,1}, \dots, \mathbf{x}_{T-q,1}, \mathbf{x}_{T-1,2}, \dots, \mathbf{x}_{T-q,2}, \dots, \mathbf{x}_{T-1,n}, \dots, \mathbf{x}_{T-q,n}]$$

#### 1.3.1 Calculation

The weight vector is obtained from OLS regression. The algorithm is as the following:

---

#### Algorithm 3 SRFCI Construction

---

```

1: for each increasing update interval  $u_j$ ,  $j \leftarrow 0$  to  $N$  do
2:   Standardize  $X_{T+u_j}$  by its mean and sd
3:   Set  $c = 0$  and  $k = 0$ 
4:   for  $i = 1$  to  $n$  do
5:     Regress  $\mathbf{y}_{T+u_j}$  on  $[\mathbf{x}_{T+u_j-1,i}, \dots, \mathbf{x}_{T+u_j-q,i}]$ 
6:     Extract 3 coefficients with smallest  $p$ -value (including intercept)
7:     Regress on the 3 selected variables
8:     Drop insignificant coefficients with  $p$ -value larger than constant  $p_0$ 
9:     if there are at least one remaining variables then
10:       $c = c + 1$ 
11:      Save the remaining coefficient estimates as  $\mathbf{w}_{i,u_j}$ 
12:      Set other insignificant coefficient estimates to zero
13:      if intercept  $\beta_0$  is significant then
14:         $k = k + \beta_0$ 
15:      end if
16:    else
17:      Set  $\mathbf{w}_{i,u_j} = 0$ 
18:    end if
19:  end for
20:  Standardize  $X_{T+u_j+h}$  by the mean and sd of  $X_{T+u_j}$ 
21:  Compute  $\mathbf{f}_{T+u_j+h}^{sr} = \frac{1}{c}(X_{T+u_j+h}\mathbf{w}_{u_j} + k)$ 
22: end for
```

---

In **line 4**, we are basically regressing the dependent variable on the lagged independent variables grouped by their original variable.

#### 1.3.2 Index Concatenation

The SRFCI  $\mathbf{f}^{sr}$  concatenation process differs from LRFCI with an extra mean adjustment step since  $\mathbf{f}^{sr}$  is not standardized.

---

**Algorithm 4** SRFCI Concatenation

---

- 1: **for** each update interval  $u_j$ ,  $j \leftarrow 0$  to  $N$  **do**
  - 2:     **for** each update interval  $u_k$ ,  $k > j$  **do**
  - 3:         Set  $\mathbf{f}_{u_k}^{sr} = \mathbf{f}_{u_j}^{sr} - \overline{\mathbf{f}_{u_j}^{sr}} + \overline{\mathbf{f}_{u_k}^{sr}}$
  - 4:     **end for**
  - 5: **end for**
-

## Chapter 2

# Documentation

## 2.1 LRFCI\_main

This script includes the input section and the 'run' section to produce LRFCI.

### 2.1.1 Path Variables

These variables specify the folders to be used. They can be the same.

#### Arguments

primary\_directory: the main directory  
library\_directory: the directory for the scripts  
data\_directory: the directory for data files  
output\_directory: the director for output files

#### Example

```
primary_directory = 'C:/Users/Ho Tak Yui/Documents/FCI Project/R code-  
andy'  
  
library_directory = 'C:/Users/Ho Tak Yui/Documents/FCI Project/R code-  
andy/implementation'  
  
data_directory = 'C:/Users/Ho Tak Yui/Documents/FCI Project/R code-  
andy/data'  
  
output_directory = primary_directory
```

### 2.1.2 Input File Names

dependent\_filename: the y variable in a txt file  
indicator\_filename: the X variables in a txt file

#### Example

```
dependent_filename = 'ch_lmпиwpi.txt'  
indicator_filename = 'g_ori.txt'
```

### 2.1.3 Function Parameters

These parameters are passed to the scripts to produce LRFCI.

### Arguments

fbgn: begin date

fend: end date

forecasting\_horizon: the forecasting period for the fci

maxLag: the maximum lags to be created for the independent variables

ncomp: the number of latent factors: some functions are not implemented for  $n > 1$

update\_interval: the update period number for the moving window; usually the same as forecasting\_horizon

n\_update: the number of updates in the moving window

### Example

```
fbgn = "1993-07-01"
```

```
fend = "2005-12-01"
```

```
forecasting_horizon = 12
```

```
maxLag = 6
```

```
ncomp = 1
```

```
update_interval = forecasting_horizon
```

```
n_update = 10
```

## 2.1.4 Output File Names

### Arguments

save\_output: TRUE/FALSE; specifies if you want to produce output files

lrfei\_filename: the file name for lrfei

weight\_filename: the file name for weight of independent variables

filtered\_weight\_filename: the file name for the filtered weight table

### Example

```
save_output = TRUE
```

```
lrfei_filename = 'lrfei.csv'
```

```
weight_filename = 'lr_weight.csv'
```

```
filtered_weight_filename = 'lr_filtered_weight.csv'
```

### 2.1.5 Script Function Calls

The remaining scripts call the functions in `common.R` and `LRFCI.R` to produce the index.

`data_read`

`data_lag_expansion`

`mov_win_pls`

`flatten_wgt`

`w_sparse`

`filtered_table`

`conca`

## 2.2 SRFCl\_main

This script includes the input section and the 'run' section to produce SRFCl and is similar to LRFCl\_main.

### 2.2.1 Path Variables

These variables specify the folders to be used. They can be the same.

#### Arguments

primary\_directory: the main directory  
library\_directory: the directory for the scripts  
data\_directory: the directory for data files  
output\_directory: the director for output files

#### Example

```
primary_directory = 'C:/Users/Ho Tak Yui/Documents/FCI Project/R code_-  
andy'  
library_directory = 'C:/Users/Ho Tak Yui/Documents/FCI Project/R code_-  
andy/implementation'  
data_directory = 'C:/Users/Ho Tak Yui/Documents/FCI Project/R code_-  
andy/data'  
output_directory = primary_directory
```

### 2.2.2 Input File Names

dependent\_filename: the y variable in a txt file  
indicator\_filename: the X variables in a txt file

#### Example

```
dependent_filename = 'ch_gr12ir.txt'  
indicator_filename = 'g_ori.txt'
```

### 2.2.3 Function Parameters

These parameters are passed to the scripts to produce LRFCl.

### **Arguments**

fbgn: begin date

fend: end date

forecasting\_horizon: the forecasting period for the fci

start\_lag: the starting lag

maxLag: the maximum lags to be created for the independent variables

update\_interval: the update period number for the moving window; usually the same as forecasting\_horizon

n\_update: the number of updates in the moving window

p\_value: the filtered threshold for the independent variables

lag\_length:  $\text{max\_lag} - \text{start\_lag} + 1$

### **Example**

fbgn = "1993-07-01"

fend = "2005-12-01"

forecasting\_horizon = 12

start\_lag = 1

maxLag = 6

ncomp = 1

update\_interval = forecasting\_horizon

n\_update = 5

p\_value = .1

lag\_length =  $\text{max\_lag} - \text{start\_lag} + 1$

## **2.2.4 Output File Names**

### **Arguments**

save\_output: TRUE/FALSE; specifies if you want to produce output files

fci\_filename: the file name for fci

unconca\_filename: the file name for weight of independent variables

filtered\_weight\_filename: the file name for the filtered weight table



**Example**

```
save_output = TRUE  
fci_filename = 'srfci.csv'  
unconca_filename = 'sr_unconca.csv'  
filtered_weight_filename = 'sr_filtered_weight.csv'
```

**2.2.5 Script Function Calls**

The remaining scripts call the functions in common.R and LRFCI.R to produce the index.

```
data_read  
data_lag_expansion  
gen_samp  
leading_filter  
weight_table  
sr_conca
```

## 2.3 Common

Functions used by both LRSCI and SRSCI

### 2.3.1 packages\_check

#### Description

Install packages

#### Usage

```
packages_check(x)
```

#### Arguments

x: package name

#### Value

None

### 2.3.2 data\_read

#### Description

read the data file from .txt into R and format it into xts class

#### Usage

```
data_read(filename)
```

#### Arguments

filename: the txt file path

#### Value

an xts object

### 2.3.3 sample\_interval

#### Description

create a sample time interval from data or start\_period/end\_period or both

#### Usage

```
sample_interval(data, start_period = time(first(data)), end_period = time(last(data)),  
start_increment = 0, end_increment = 0)
```

**Arguments**

data: an xts object; can be NULL

start\_period: a date

end\_period: a date

start\_increment: number of months added to start\_period

end\_increment: number of months added to end\_period

**Value**

an interval e.g. "1990-01-01/2018-03-01"

**Example**

```
sample_interval(data)
```

```
sample_interval(NULL, "1990-01-01", "2018-03-01")
```

```
sample_interval(NULL, "1990-01-01", "2018-03-01", 12, 12)
```

**2.3.4 standardize\_data****Description**

enable out-of-sample standardization by subtracting mean and divided by std dev

**Usage**

```
standardize_data(data, insample_interval, outsample_interval = insample_interval)
```

**Arguments**

data: an xts object

insample\_interval: an xts interval

outsample\_interval: an xts interval

**Value**

a rescaled xts object

**Example**

```
standardize_data(data, "1990-01-01/2018-03-01")
```

```
standardize_data(data, "1990-01-01/2017-03-01", "1991-01-01/2018-03-01")
```

### 2.3.5 weight\_table

#### Description

reformat the weight matrix to a table of filtered weight

#### Usage

```
weight_table(weight, table_fmt='multi')
```

#### Arguments

weight: the weight matrix of n(variables) rows and t(period) columns

table\_fmt: 'multi': multi level indexing and more human readable / 'single':  
single level indexing and more machine-readable

#### Value

a dataframe object

## 2.4 LRFCI

Functions used in producing LRFCI.

### 2.4.1 pls1

#### Description

pls1 algo copied from wikipedia which is not actually used

#### Usage

```
pls1(X, y, l=1)
```

#### Arguments

X: matrix of independent variables

y: vector of the dependent variable

l: the limit on the number of latent factors in the regression

#### Value

a matrix of least square estimate (b0, b1)

### 2.4.2 matpls1

#### Description

pls1 algo copied from Eviews

#### Usage

matpls1(X, y, l=1)

#### Arguments

X: matrix of independent variables

y: vector of the dependent variable

l: the limit on the number of latent factors in the regression

#### Value

a list containing

t: the score vector

w: the weight vector

p: the loading vector

### 2.4.3 modifiedW

#### Description

produces the modified weight from the weight vector: the raw weight is corresponding to the deflated independent variables (weight); the modified weight is corresponding to the original independent variables (loading)

#### Usage

modifiedW(weight, loading, ncomp, n=dim(weight)[1])

#### Arguments

weight: the weight vector (see 2.4.2)

loading: the loading vector (see 2.4.2)

ncomp: the number of latent factors

n: number of variables in the weight vector

**Value**

a modified weight vector (matrix if  $n > 1$ )

**2.4.4 sparseW****Description**

filtered the lag with largest loading (modified weight); weights of others are set to zero

**Usage**

`sparseW(weight, ncomp, maxLag)`

**Arguments**

`weight`: the weight vector (see 2.4.2, 2.4.3)

`ncomp`: the number of latent factors

`maxLag`: the maximum lag of independent variables

**Value**

a sparse weight vector (matrix if  $n > 1$ )

**2.4.5 insig\_stats****Description**

label the insignificant independent variables by the magnitude of the modified weight

**Usage**

`sparseW(weight, ncomp, maxLag)`

**Arguments**

`weight`: the weight vector (see 2.4.2, 2.4.3, 2.4.4)

`ncomp`: the number of latent factors

**Value**

a list containing

`w_filtered`: a weight vector of non-zero weights

`insig_indicators`: a filtered weight vector with elements of each absolute value less than 0.05

`insig_indicators1`: a filtered weight vector with elements of each value less than 0.6 quantile and larger than 0.4 quantile

**2.4.6 all\_matpls1****Description**

an aggregate function corresponding to `sub_all_matpls1` in EViews.

**Dependencies**

`standardize_data` 2.3.4

`matpls1` 2.4.2

`modifiedW` 2.4.3

`sparseW` 2.4.4

`insig_stats` 2.4.5

**Usage**

```
all_matpls1(data, dependent, in_samp, out_samp=in_samp, ncomp=1, method='plsr')
```

**Arguments**

`data`: an xts containing independent variables ( $X$ )

`dependent`: an xts containing dependent variables ( $y$ )

`in_samp`: in-the-sample period

`out_samp`: out-of-sample period if applicable

`ncomp`: the number of latent factors

`method`: 'eviews': the EViews method; 'plsr': the R package `plsr`

**Value**

a list containing

loadings: the loading vector

weight: the weight vector

scores: the score vector

w\_modified: the modified weight vector

w\_sparse: the sparse weight vector

sparse\_factor: independent variables times sparse weight

w\_filtered: a weight vector of non-zero weights

insig\_indicators: a filtered weight vector with elements of each absolute value less than 0.05

insig\_indicators1: a filtered weight vector with elements of each value less than 0.6 quantile and larger than 0.4 quantile

**2.4.7 mov\_win\_pls****Description**

a moving window implementation of all\_matpls1

**Usage**

```
mov_win_pls(data, dependent, fbgn, fend, forecasting_horizon, update_interval,  
n_update, ncomp=1)
```

**Arguments**

data: an xts containing independent variables (X)

dependent: an xts containing dependent variables (y)

in\_samp: in-the-sample period

out\_samp: out-of-sample period if applicable

ncomp: the number of latent factors

method: 'eviews': the EViews method; 'pls': the R package pls



**Value**

a list containing

loadings: the loading vector

weight: the weight vector

scores: the score vector

w\_modified: the modified weight vector

w\_sparse: the sparse weight vector

sparse\_factor: independent variables times sparse weight

w\_filtered: a weight vector of non-zero weights

insig\_indicators: a filtered weight vector with elements of each absolute value less than 0.05

insig\_indicators1: a filtered weight vector with elements of each value less than 0.6 quantile and larger than 0.4 quantile

**2.4.8 conca****Description**

concatenate the factor and align a single output the list of pls results

**Usage**

```
conca(ls, fend, update_interval, attr = 'sparse_factor')
```

**Arguments**

ls: the list of factor to be concatenated

fend: the end date

update\_interval: the number of months to be updated

attr: the variable name to be concatenated

**Value**

the concatenated factor matrix. Each column is an update.

**2.4.9 flatten\_wgt****Description**

flatten a list: convert from a list to a matrix

**Usage**

`flatten_wgt(ls, attr='weight')`

**Arguments**

`ls`: the list of to be flattened

`attr`: the variable name to be flattened

**Value**

a weight matrix. Each column is an update.

## 2.5 SRFCI

Functions used in producing SRCFI.

### 2.5.1 `gen_samp`

**Description**

generate the sample pairs for moving window iteration

**Usage**

`gen_samp(fbgn, fend, forecasting_horizon, max_lag, update_interval, n_update)`

**Arguments**

`fbgn`: begin date

`fend`: end date

`forecasting_horizon`: the forecasting period for the fci

`maxLag`: the maximum lags to be created for the independent variables

`update_interval`: the update period number for the moving window; usually the same as `forecasting_horizon`

`n_update`: the number of updates in the moving window

**Value**

a matrix of sample interval containing training periods and forecasting periods

## 2.5.2 regr

### Description

1. produce ols regression coefficients
2. select the most significant three
3. filter the three variables by p-value

### Usage

```
regr(data_lag, dependent, samp, p_value = .1)
```

### Arguments

data\_lag: matrix of independent variables (and lags)

dependent: vector of the dependent variable

samp: the sampling interval

p\_value: the filtering threshold

### Value

a list containing

weight: filtered ols estimates as the weight vector

const: accumulated significant intercepts in every regression

ind\_count: the number of regression with at least one significant coeff (including intercept)

## 2.5.3 leading\_filter

### Description

a moving window implementation to produce weight and factor

### Usage

```
leading_filter(data_lag, dependent, sample, p_value = .1)
```

### Arguments

data\_lag: matrix of independent variables (and lags)

dependent: vector of the dependent variable

sample: the sampling period table produced by gen\_samp 2.5.1

**Value**

a list containing

factor\_ts: the latent factor time series matrix. Each column is an iteration.  
Each row is a time period.

weight\_ts: the weight matrix. Each column is an iteration.

const\_ts: an array of accumulated significant intercepts in each iteration

ind\_count\_ts: an array of the number of regression with at least one significant  
coeff (including intercept) in each iteration

**2.5.4 sr\_conca****Description**

the short run index concatenation function to keep the old value of the index

**Usage**

```
sr_conca(factor, ind_count, fend, update_interval, forecasting_horizon, n_update  
= dim(factor)[2]-1)
```

**Arguments**

factor: the factor matrix produced by leading\_filter 2.5.3

ind\_count: the array of the number of regression with at least one significant  
coeff produced by leading\_filter 2.5.3; this is used to average the factor

fend: end date

forecasting\_horizon: the forecasting period for the fci

update\_interval: the update period number for the moving window

n\_update: the number of updates in the moving window; should be the same  
as number of columns of factor minus one

**Value**

a list containing

conca: the concatenated index

unconca: the un-concatenated index

## Chapter 3

### Note

## 3.1 LRFCI Note

### 3.1.1 Regression

We start with a data matrix

$$X = [x_1, x_2, \dots, x_n]$$

where  $x_i$  is the  $i^{th}$ ,  $i = 1, \dots, n$  independent variable of  $T$  periods. We also have  $y$  as the dependent variable of length  $T$ . We first create  $q$  lags for each  $x_i$  and **standardize** each column.

$$X_t = [x_{1,t}, x_{1,t-1}, \dots, x_{1,t-q}, x_{2,t}, x_{2,t-1}, \dots, x_{2,t-q}, \dots, x_{n,t}, x_{n,t-1}, \dots, x_{n,t-q}]$$

Since we take  $q = 6$ , the dimension of  $X_t$  is  $T \times (7n)$ . The main idea is to regress  $y$  on each column of  $X_t$  one-by-one.

$$y_t = x_{i,t-q} \beta_{i,t-q} + \epsilon_{i,t-q} \quad i = 1, \dots, n \text{ and } q = 0, \dots, 6$$

and the OLS estimate of  $\beta$  is

$$\hat{\beta}_{i,t-q} = \frac{\sum_{t=1}^T x_{i,t-q} y_t}{\sum_{t=1}^T x_{i,t-q}^2}$$

Since  $X$  is standardized,  $\sum x_i \rightarrow 0$  and  $\sum x_i^2 \rightarrow T$

$$\hat{\beta}_{i,t-q} = \frac{1}{T} \sum_{t=1}^T x_{i,t-q} y_t$$

Consider  $X_t^T y_t$ ,

$$X_t^T y_t = \begin{bmatrix} x_{1,t}^T \\ x_{1,t-1}^T \\ \vdots \\ x_{1,t-q}^T \\ x_{2,t}^T \\ x_{2,t-1}^T \\ \vdots \\ x_{2,t-q}^T \\ \vdots \\ x_{n,t}^T \\ x_{n,t-1}^T \\ \vdots \\ x_{n,t-q}^T \end{bmatrix} y_t$$

and

$$x_{i,t-q}^T y_t = \sum_t x_{i,t-q} y_t = T \beta_{i,t-q}^{\wedge}$$

Then the weight vector  $w = X^T y / |X^T y|$  is just a re-scaled version of  $\hat{\beta}$ .

### 3.1.2 Factor Construction

Consider

$$\begin{aligned} f = Xw &= [x_1, \dots, x_n] \begin{bmatrix} w_1 \\ w_2 \\ \vdots \\ w_n \end{bmatrix} \\ &= x_1 w_1 + \dots x_n w_n \end{aligned}$$

Then the variance becomes

$$Var(f) = \sum_{i=1}^n w_i^2 Var(x_i) + \sum_{i \neq j} w_i w_j Cov(x_i, x_j)$$

Since  $x_i$ s are standardized and further if we normalize the weight vector, i.e.  $|w|_2 = 1$ ,

$$Var(f) = 1 + \sum_{i \neq j} w_i w_j Corr(x_i, x_j) \neq 1$$

## 3.2 SRFCI Note

Regress the dependent variable  $y$  on an independent variable (with lags)  $x_i$ ,  $i = 1, \dots, n$ :

$$y = \beta_{0i} + \beta_{1i} x_i + \epsilon_i$$

to obtain an estimator of  $y$ :

$$\hat{y}_i = \hat{\beta}_{0i} + \hat{\beta}_{1i} x_i$$

The estimator of  $y$  is then

$$\hat{y} = \frac{1}{n} \sum_{i=1}^n \hat{y}_i = \frac{1}{n} \sum_{i=1}^n \hat{\beta}_{0i} + \frac{1}{n} \sum_{i=1}^n \hat{\beta}_{1i} x_i$$
